# Supplementary material for: Comparison of colostrum and milk extracellular vesicles small RNA cargo in water buffalo
Source: PubMed Central journal article supplement (PMC11297979; doi:10.1038/s41598-024-67249-6), 2024-08-03
Supplement: 41598_2024_67249_MOESM2_ESM.pdf [file 41598_2024_67249_MOESM2_ESM.pdf]

**Mean counts and standard deviation of the mean counts for each sample group of colosEV specific, mEV specific and shared miRNA reported in Table 3**

| <i>List</i>                   | miRNA          | Counts (mean) colosEVs | Counts (SD) colosEVs | Counts (mean) mEVs | Counts (SD) mEVs |
|-------------------------------|----------------|------------------------|----------------------|--------------------|------------------|
| <i>coloEV specific miRNAs</i> | bta-mir-12048  | 13.5                   | 3.8                  | 3.3                | 2.0              |
|                               | bta-mir-133c   | 11.9                   | 11.4                 | 1.1                | 2.5              |
|                               | bta-mir-181d   | 16.2                   | 17.0                 | 4.9                | 3.4              |
|                               | bta-mir-18b    | 12.8                   | 7.4                  | 4.7                | 4.9              |
|                               | bta-mir-204    | 15.4                   | 9.6                  | 5.1                | 5.2              |
|                               | bta-mir-211    | 10.7                   | 11.5                 | 2.1                | 3.1              |
|                               | bta-mir-2284o  | 14.7                   | 7.8                  | 6.1                | 5.6              |
|                               | bta-mir-2285cp | 26.5                   | 18.9                 | 2.0                | 1.8              |
|                               | bta-mir-301a   | 16.8                   | 11.1                 | 8.8                | 14.1             |
|                               | bta-mir-365-1  | 7.8                    | 5.4                  | 2.7                | 4.0              |
| <i>mEV specific miRNAs</i>    | bta-mir-103a-2 | 4.6                    | 2.0                  | 15.6               | 11.0             |
|                               | bta-mir-1185   | 1.4                    | 1.9                  | 143.9              | 114.1            |
|                               | bta-mir-12010  | 4.1                    | 2.2                  | 33.0               | 17.4             |
|                               | bta-mir-12031  | 5.2                    | 2.6                  | 28.2               | 40.4             |
|                               | bta-mir-12038  | 3.0                    | 3.6                  | 16.2               | 9.0              |
|                               | bta-mir-12061  | 6.1                    | 3.8                  | 38.9               | 16.7             |
|                               | bta-mir-127    | 1.4                    | 2.0                  | 284.9              | 177.6            |
|                               | bta-mir-136    | 0.2                    | 0.4                  | 27.5               | 27.0             |
|                               | bta-mir-154a   | 1.0                    | 0.8                  | 280.5              | 202.4            |
|                               | bta-mir-154b   | 4.0                    | 6.4                  | 1302.3             | 869.9            |
|                               | bta-mir-154c   | 0.3                    | 0.7                  | 23.7               | 19.3             |
|                               | bta-mir-2284n  | 3.2                    | 3.0                  | 86.6               | 39.0             |
|                               | bta-mir-2285ap | 1.3                    | 1.3                  | 39.7               | 21.2             |
|                               | bta-mir-2285cl | 0.0                    | 0.0                  | 21.0               | 12.2             |
|                               | bta-mir-2397   | 5.7                    | 2.7                  | 18.6               | 10.1             |
|                               | bta-mir-2889   | 2.9                    | 2.7                  | 17.4               | 13.9             |
|                               | bta-mir-2892   | 2.6                    | 1.5                  | 24.8               | 15.7             |
|                               | bta-mir-299    | 3.7                    | 5.1                  | 993.7              | 670.8            |
|                               | bta-mir-323    | 3.1                    | 2.7                  | 1095.9             | 643.5            |
|                               | bta-mir-323b   | 0.8                    | 0.8                  | 497.7              | 338.5            |
|                               | bta-mir-329b   | 0.1                    | 0.2                  | 44.3               | 25.2             |
|                               | bta-mir-3578   | 0.1                    | 0.2                  | 63.6               | 45.1             |
|                               | bta-mir-376d   | 0.2                    | 0.6                  | 55.1               | 37.1             |
|                               | bta-mir-376e   | 0.5                    | 1.1                  | 103.4              | 79.3             |
|                               | bta-mir-379    | 5.2                    | 5.8                  | 2766.6             | 1714.2           |
|                               | bta-mir-380    | 2.6                    | 4.0                  | 395.1              | 257.9            |
|                               | bta-mir-381    | 0.1                    | 0.2                  | 18.5               | 14.1             |
|                               | bta-mir-3956   | 0.0                    | 0.0                  | 58.7               | 52.9             |

|                      |                |          |          |          |          |
|----------------------|----------------|----------|----------|----------|----------|
|                      | bta-mir-409a   | 0.5      | 1.4      | 346.9    | 206.7    |
|                      | bta-mir-411c   | 2.3      | 2.9      | 1630.7   | 979.0    |
|                      | bta-mir-412    | 0.1      | 0.4      | 36.3     | 24.5     |
|                      | bta-mir-453    | 0.1      | 0.2      | 86.7     | 48.9     |
|                      | bta-mir-485    | 0.5      | 0.8      | 175.1    | 137.4    |
|                      | bta-mir-487b   | 3.3      | 3.7      | 1798.1   | 1225.2   |
|                      | bta-mir-493    | 2.3      | 4.9      | 988.2    | 605.8    |
|                      | bta-mir-495    | 0.0      | 0.0      | 23.1     | 17.4     |
|                      | bta-mir-541    | 0.7      | 0.9      | 139.1    | 109.8    |
|                      | bta-mir-543    | 0.1      | 0.2      | 227.6    | 153.7    |
|                      | bta-mir-6516   | 3.9      | 2.6      | 38.8     | 23.8     |
|                      | bta-mir-654    | 0.3      | 0.9      | 40.0     | 28.2     |
|                      | bta-mir-655    | 0.2      | 0.5      | 115.8    | 78.3     |
|                      | bta-mir-665    | 0.5      | 1.1      | 84.2     | 70.9     |
|                      | bta-mir-758    | 0.5      | 1.0      | 34.7     | 31.3     |
|                      | bta-mir-92b    | 2.9      | 2.8      | 19.9     | 8.5      |
| <i>shared miRNAs</i> | bta-mir-125a   | 15323.4  | 7943.0   | 34360.4  | 13644.9  |
|                      | bta-mir-151    | 186641.8 | 75996.3  | 621871.5 | 220765.2 |
|                      | bta-mir-151a   | 6314.3   | 2686.3   | 17746.8  | 4912.5   |
|                      | bta-mir-15a    | 5305.1   | 4042.0   | 19875.0  | 13706.3  |
|                      | bta-mir-16a    | 8844.5   | 4199.6   | 21960.2  | 9113.6   |
|                      | bta-mir-181a-1 | 16350.8  | 6392.7   | 32591.5  | 10131.4  |
|                      | bta-mir-185    | 14064.0  | 5921.9   | 40379.9  | 15794.0  |
|                      | bta-mir-186    | 24362.6  | 14147.7  | 72455.7  | 34403.4  |
|                      | bta-mir-191    | 354367.4 | 120393.3 | 767216.1 | 255937.2 |
|                      | bta-mir-200b   | 65246.2  | 33189.0  | 194652.8 | 67963.3  |
|                      | bta-mir-200c   | 157425.1 | 69663.7  | 815732.9 | 337053.9 |
|                      | bta-mir-223    | 1754.7   | 1989.4   | 23088.7  | 37910.7  |
|                      | bta-mir-2285t  | 33096.8  | 18221.2  | 11339.9  | 9644.5   |
|                      | bta-mir-26b    | 263461.1 | 122551.7 | 823206.4 | 473635.2 |
|                      | bta-mir-29a    | 3148.6   | 1505.8   | 15188.6  | 8548.2   |
|                      | bta-mir-30a    | 87689.0  | 34874.8  | 251887.4 | 106862.4 |
|                      | bta-mir-30b    | 21239.9  | 14796.4  | 53941.5  | 33281.6  |
|                      | bta-mir-30d    | 9528.0   | 3786.7   | 21751.6  | 8287.1   |
|                      | bta-mir-345    | 4196.0   | 3027.4   | 9755.2   | 5692.8   |
|                      | bta-mir-34a    | 63929.1  | 52377.3  | 9584.4   | 4024.0   |
|                      | bta-mir-3600   | 3345.7   | 1517.8   | 48692.3  | 18087.4  |
|                      | bta-mir-362    | 3161.8   | 1310.0   | 9897.9   | 3194.1   |
|                      | bta-mir-375    | 2676.3   | 2703.4   | 419538.7 | 80000.7  |
|                      | bta-mir-423    | 27727.6  | 15720.9  | 61562.8  | 28395.8  |
|                      | bta-mir-425    | 9953.6   | 4310.8   | 22905.7  | 6275.5   |
|                      | bta-mir-499    | 3015.8   | 2062.8   | 16312.9  | 12200.0  |
|                      | bta-mir-652    | 7386.9   | 2981.6   | 17837.6  | 7288.5   |

|  |             |         |         |         |         |
|--|-------------|---------|---------|---------|---------|
|  | bta-mir-660 | 30289.0 | 14030.5 | 65301.5 | 27046.6 |
|  | bta-mir-669 | 4667.4  | 1676.4  | 33716.8 | 13363.6 |
